# Supplementary material for: Mosquito net coverage in years between mass distributions: a case study of Tanzania, 2013
Source: PubMed Central journal article supplement (PMC5831856; doi:10.1186/s12936-018-2247-z), 2018-03-01
Supplement: 12936_2018_2247_MOESM1_ESM.pdf [file 12936_2018_2247_MOESM1_ESM.pdf]

**Table 1: Ownership, access, and use of nets (any type) by socio-economic quintile in Tanzania, October – December, 2013**

| Socio-economic quintile | Household ownership <sup>1</sup>  | Households with enough nets <sup>2</sup> | Population access <sup>3</sup>    | Population net use <sup>4</sup>   | Use:access ratio <sup>5</sup> |
|-------------------------|-----------------------------------|------------------------------------------|-----------------------------------|-----------------------------------|-------------------------------|
| Poorest                 | 78.1<br>(70.8-84.0)               | 27.8<br>(22.5-33.8)                      | 50.8<br>(44.7-56.9)               | 33.9<br>(27.9-39.8)               | 0.67                          |
| Second Poorest          | 83.1<br>(79.5-86.1)               | 31.6<br>(27.4-36.1)                      | 57.7<br>(54.0-61.4)               | 38.6<br>(33.5-43.7)               | 0.67                          |
| Medium                  | 87.8<br>(84.2-90.7)               | 40.4<br>(35.9-45.0)                      | 66.3<br>(62.6-70.0)               | 47.9<br>(42.3-53.6)               | 0.72                          |
| Wealthier               | 89.3<br>(85.3-92.3)               | 48.7<br>(42.1-55.3)                      | 70.7<br>(66.0-75.4)               | 56.0<br>(50.2-61.8)               | 0.79                          |
| Wealthiest              | 86.9<br>(82.0-90.6)               | 53.3<br>(48.7-57.9)                      | 74.3<br>(69.2-79.4)               | 59.1<br>(53.6-64.5)               | 0.80                          |
| <b>Overall</b>          | <b>85.0</b><br><b>(82.3-87.4)</b> | <b>40.3</b><br><b>(36.5-44.3)</b>        | <b>63.8</b><br><b>(60.2-67.3)</b> | <b>43.5</b><br><b>(39.2-47.8)</b> | <b>0.73</b>                   |

<sup>1-5</sup> Descriptions of mosquito net indicators are listed on Table 1

**Table 2: Ownership, access, and use of LLINs by socio-economic quintile in Tanzania, October – December, 2013**

| Socio-economic quintile | Household ownership <sup>1</sup> | Households with enough nets <sup>2</sup> | Population access <sup>3</sup> | Population net use <sup>4</sup> | Use:access ratio <sup>5</sup> |
|-------------------------|----------------------------------|------------------------------------------|--------------------------------|---------------------------------|-------------------------------|
| Poorest                 | 74.1<br>(67.0-80.2)              | 20.7<br>(16.2-26.2)                      | 44.0<br>(38.8-49.2)            | 28.2<br>(23.2-33.2)             | 0.64                          |
| Second Poorest          | 76.5<br>(71.8-80.6)              | 23.5<br>(19.9-27.6)                      | 48.4<br>(44.8-52.0)            | 30.8<br>(26.7-35.0)             | 0.64                          |
| Medium                  | 78.6<br>(72.8-83.5)              | 24.9<br>(21.3-28.9)                      | 54.0<br>(49.9-58.1)            | 36.1<br>(31.3-41.0)             | 0.67                          |
| Wealthier               | 76.8<br>(71.7-81.1)              | 28.5<br>(23.9-33.6)                      | 54.3<br>(49.5-59.0)            | 37.8<br>(33.3-42.4)             | 0.70                          |
| Wealthiest              | 66.6                             | 21.4                                     | 45.8                           | 31.6                            | 0.69                          |

|                |                                   |                                   |                                   |                                   |             |
|----------------|-----------------------------------|-----------------------------------|-----------------------------------|-----------------------------------|-------------|
|                | (59.2-73.2)                       | (17.2-26.2)                       | (40.7-51.0)                       | (28.2-35.0)                       |             |
| <b>Overall</b> | <b>74.5</b><br><b>(71.0-77.7)</b> | <b>23.8</b><br><b>(21.2-26.7)</b> | <b>49.2</b><br><b>(46.3-52.0)</b> | <b>32.8</b><br><b>(29.9-35.8)</b> | <b>0.66</b> |

<sup>1-5</sup> Descriptions of mosquito net indicators are listed on Table 1

**Table 3: Ownership, access, and use of untreated nets by socio-economic quintile in Tanzania, October – December, 2013**

| <b>Socio-economic quintile</b> | <b>Household ownership<sup>1</sup></b> | <b>Households with enough nets<sup>2</sup></b> | <b>Population access<sup>3</sup></b> | <b>Population net use<sup>4</sup></b> | <b>Use:access ratio<sup>5</sup></b> |
|--------------------------------|----------------------------------------|------------------------------------------------|--------------------------------------|---------------------------------------|-------------------------------------|
| Poorest                        | 19.9<br>(16.1-24.2)                    | 4.0<br>(2.6-6.0)                               | 8.3<br>(6.3-10.2)                    | 1.6<br>(0.6-2.6)                      | 0.19                                |
| Second Poorest                 | 24.6<br>(20.4-29.3)                    | 3.5<br>(2.0-6.1)                               | 10.9<br>(8.8-13.0)                   | 3.3<br>(1.7-4.9)                      | 0.30                                |
| Medium                         | 34.0<br>(28.9-39.5)                    | 5.2<br>(3.1-8.4)                               | 16.4<br>(13.3-19.5)                  | 5.9<br>(3.4-8.5)                      | 0.36                                |
| Wealthier                      | 44.6<br>(39.7-49.5)                    | 8.7<br>(6.4-11.5)                              | 22.6<br>(19.9-25.4)                  | 13.7<br>(9.7-17.7)                    | 0.61                                |
| Wealthiest                     | 60.5<br>(55.4-65.4)                    | 17.4<br>(14.1-21.2)                            | 37.4<br>(33.9-40.9)                  | 27.9<br>(23.1-32.8)                   | 0.75                                |
| <b>Overall</b>                 | <b>36.7</b><br><b>(32.6-41.0)</b>      | <b>7.7</b><br><b>(6.1-9.7)</b>                 | <b>18.9</b><br><b>(16.0-21.9)</b>    | <b>9.5</b><br><b>(6.8-12.2)</b>       | <b>0.50</b>                         |

<sup>1-5</sup> Descriptions of mosquito net indicators are listed on Table 1
