# Supplementary material for: Mosquito net coverage in years between mass distributions: a case study of Tanzania, 2013
Source: PubMed Central journal article supplement (PMC5831856; doi:10.1186/s12936-018-2247-z), 2018-03-01
Supplement: 12936_2018_2247_MOESM2_ESM.pdf [file 12936_2018_2247_MOESM2_ESM.pdf]

**Table 1: Ownership, access and use of LLINs by district in Tanzania, October - December, 2013**

| <b>District</b> | <b>Household ownership<sup>1</sup></b> | <b>Households with enough nets<sup>2</sup></b> | <b>Population access<sup>3</sup></b> | <b>Population net use<sup>4</sup></b> | <b>Use:access ratio<sup>5</sup></b> |
|-----------------|----------------------------------------|------------------------------------------------|--------------------------------------|---------------------------------------|-------------------------------------|
| Bagamoyo        | 83.3<br>(74.3-89.6)                    | 36.8<br>(28.7-45.6)                            | 64.3<br>(56.3-72.3)                  | 46.0<br>(38.4-53.6)                   | 0.72                                |
| Kinondoni       | 62.5<br>(40.5-80.3)                    | 19.3<br>(12.5-28.6)                            | 42.6<br>(27.8-57.4)                  | 31.1<br>(22.2-39.9)                   | 0.73                                |
| Kilosa          | 81.3<br>(72.5-87.7)                    | 32.5<br>(23.7-42.7)                            | 55.7<br>(45.6-65.9)                  | 40.5<br>(29.2-51.8)                   | 0.73                                |
| Iringa          | 70.6<br>(62.1-77.9)                    | 24.1<br>(16.9-33.0)                            | 49.1<br>(42.9-55.4)                  | 32.3<br>(28.1-36.5)                   | 0.66                                |
| Mbozi           | 63.3<br>(49.7-75.0)                    | 21.6<br>(14.8-30.5)                            | 43.7<br>(33.4-54.1)                  | 16.9<br>(8.7-25.0)                    | 0.39                                |
| Kahama          | 72.5<br>(60.0-82.3)                    | 18.8<br>(13.2-26.0)                            | 44.1<br>(34.5-53.7)                  | 22.8<br>(15.6-30.1)                   | 0.52                                |
| Geita           | 77.3<br>(66.5-85.4)                    | 16.0<br>(12.2-20.8)                            | 45.6<br>(40.7-50.5)                  | 33.6<br>(28.4-38.8)                   | 0.74                                |
| Musoma          | 80.8<br>(74.1-86.0)                    | 20.0<br>(13.8-27.9)                            | 48.6<br>(42.9-54.4)                  | 39.0<br>(32.0-46.0)                   | 0.80                                |
| <b>Overall</b>  | <b>74.5</b><br><b>(71.0-77.7)</b>      | <b>23.8</b><br><b>(21.2-26.7)</b>              | <b>49.2</b><br><b>(46.3-52.0)</b>    | <b>32.8</b><br><b>(29.9-35.8)</b>     | <b>0.66</b>                         |

<sup>1-5</sup> Descriptions of mosquito net indicators are listed on Table 1
